# Supplementary material for: Neural correlates of adversity-overcoming pup rescue behavior in female mice
Source: Research Square preprint supplement (doi:10.21203/rs.3.rs-7240012/v1), 2025-09-12
Supplement: Supplementary file 1 [file 6f24fd8b611d2ff9ba9c723d.xlsx]

## Sheet: Supplementary Table 1
Supplementary Table 1. Unadjusted and adjusted p-values reported in Fig. 3c
Brain region	Unadjusted p-value (Fig. 3c)	Adjusted p-value (FDR)
A24	0.0333	0.2844
A25	0.932	0.958629
AcbSh	0.0673	0.30285
AcbC	0.564	0.884571
DTT/SHi	0.687	0.884571
LS	0.0312	0.2844
MPN	0.191	0.597
cMPOA	0.382	0.7056
aACN	0.038	0.2844
pACN	0.867	0.929647
BNSTal	0.392	0.7056
BNSTmpm	0.651	0.884571
BNSTrh	1	1
BNSTtr	0.793	0.929647
PVN	0.324	0.68
SON	0.34	0.68
MeA	0.688	0.884571
MePD	0.827	0.929647
MePV	0.857	0.929647
BLA	0.0402	0.2844
BMA	0.878	0.929647
Aco	0.617	0.884571
aCeM	0.18	0.597
aCeC	0.577	0.884571
pCeL	0.199	0.597
LA	0.247	0.635143
BLP	0.242	0.635143
BMP	0.177	0.597
BLV	0.573	0.884571
AHiPM(AL)	0.751	0.929647
PMCo	0.671	0.884571
LC	0.316	0.68
MPB	0.0658	0.30285
LPB	0.0474	0.2844
DRC	0.031	0.2844
extDRC	0.283	0.6792

## Sheet: Supplementary Table 2
Supplementary Table 2. Pearson correlation coefficients, unadjusted and adjusted p-values reported in Fig. 3e.
Behavior	Brain region	Correlation coefficinet	Unadjusted p-value (Fig. 3e)	Adjusted p-value (FDR)
First crossing of the pool
E1	A24	-0.61149	0.020145	0.280986
E1	A25	-0.07248	0.8055	0.949351
E1	AcbSh	-0.59897	0.02361	0.280986
E1	AcbC	-0.41754	0.137415	0.586635
E1	DTT/SHi	-0.27438	0.342467	0.754183
E1	LS	-0.52882	0.051861	0.369001
E1	MPN	0.404071	0.151885	0.618106
E1	cMPOA	-0.32219	0.283008	0.712084
E1	aACN	-0.43205	0.140391	0.586635
E1	pACN	0.117832	0.701438	0.948855
E1	BNSTaI	-0.43205	0.140391	0.586635
E1	BNSTmpm	0.150294	0.65915	0.929163
E1	BNSTrh	-0.21845	0.518724	0.858701
E1	BNSTtr	-0.29916	0.344861	0.754183
E1	PVN	0.1681	0.583038	0.897571
E1	SON	-0.14496	0.636568	0.922333
E1	MeA	-0.22227	0.487467	0.857648
E1	MePD	-0.2438	0.445092	0.812566
E1	MePV	-0.14527	0.669985	0.938782
E1	BLA	-0.6574	0.014616	0.280986
E1	BMA	-0.01796	0.955828	0.983253
E1	Aco	-0.22586	0.480287	0.848205
E1	aCeM	-0.43604	0.15647	0.620575
E1	aCeC	0.128631	0.690328	0.941287
E1	pCeL	-0.3227	0.333097	0.754183
E1	LA	0.202206	0.528533	0.864872
E1	BLP	-0.41663	0.177885	0.635714
E1	BMP	-0.24596	0.440942	0.812566
E1	BLV	0.34463	0.272631	0.693679
E1	AHiPM(AL)	0.27777	0.43713	0.812566
E1	PMCo	0.018939	0.958586	0.983253
E1	LC	-0.24127	0.427131	0.8093
E1	MPB	-0.40119	0.174252	0.635714
E1	LPB	-0.40873	0.187098	0.635714
E1	DRC	-0.38498	0.216545	0.651003
E1	extDRC	-0.00717	0.982355	0.990823
Sniffing of tube 1
Sm1	A24	-0.65103	0.011677	0.280986
Sm1	A25	-0.05029	0.864436	0.970205
Sm1	AcbSh	-0.60449	0.022031	0.280986
Sm1	AcbC	-0.38061	0.179424	0.635714
Sm1	DTT/SHi	-0.26089	0.36765	0.770057
Sm1	LS	-0.53598	0.048202	0.369001
Sm1	MPN	0.376078	0.185089	0.635714
Sm1	cMPOA	-0.42797	0.144597	0.593607
Sm1	aACN	-0.53073	0.062032	0.401872
Sm1	pACN	0.005676	0.985317	0.991674
Sm1	BNSTaI	-0.491	0.088419	0.481164
Sm1	BNSTmpm	0.047902	0.888773	0.970205
Sm1	BNSTrh	-0.30201	0.366721	0.770057
Sm1	BNSTtr	-0.38414	0.217632	0.651003
Sm1	PVN	0.085027	0.782411	0.949351
Sm1	SON	-0.16872	0.581627	0.897571
Sm1	MeA	-0.18558	0.563637	0.882215
Sm1	MePD	-0.17469	0.587128	0.900216
Sm1	MePV	-0.17937	0.597684	0.910315
Sm1	BLA	-0.70767	0.006808	0.212407
Sm1	BMA	-0.10571	0.743692	0.949351
Sm1	Aco	-0.24744	0.438123	0.812566
Sm1	aCeM	-0.41908	0.175091	0.635714
Sm1	aCeC	0.123203	0.702859	0.948855
Sm1	pCeL	-0.43039	0.186378	0.635714
Sm1	LA	0.21271	0.506854	0.858701
Sm1	BLP	-0.32811	0.297781	0.738697
Sm1	BMP	-0.28638	0.366837	0.770057
Sm1	BLV	0.387836	0.212867	0.649331
Sm1	AHiPM(AL)	0.325164	0.359259	0.767732
Sm1	PMCo	0.015939	0.965141	0.983253
Sm1	LC	-0.20151	0.509148	0.858701
Sm1	MPB	-0.37463	0.207231	0.649331
Sm1	LPB	-0.3057	0.333893	0.754183
Sm1	DRC	-0.41634	0.178224	0.635714
Sm1	extDRC	-0.04367	0.8928	0.970205
Sniffing of tube 2
Sm2	A24	-0.57117	0.032885	0.31731
Sm2	A25	0.117781	0.688413	0.941287
Sm2	AcbSh	-0.59003	0.026345	0.280986
Sm2	AcbC	-0.35917	0.20723	0.649331
Sm2	DTT/SHi	-0.08844	0.763693	0.949351
Sm2	LS	-0.33447	0.242468	0.670137
Sm2	MPN	0.260401	0.368574	0.770057
Sm2	cMPOA	-0.61356	0.025725	0.280986
Sm2	aACN	-0.58916	0.03411	0.31731
Sm2	pACN	-0.16833	0.582512	0.897571
Sm2	BNSTaI	-0.44888	0.123892	0.564681
Sm2	BNSTmpm	-0.01879	0.956278	0.983253
Sm2	BNSTrh	-0.31554	0.344548	0.754183
Sm2	BNSTtr	-0.40729	0.188813	0.635714
Sm2	PVN	0.061636	0.841458	0.963529
Sm2	SON	-0.41929	0.153817	0.620572
Sm2	MeA	0.078871	0.807504	0.949351
Sm2	MePD	0.129073	0.68931	0.941287
Sm2	MePV	0.014058	0.967277	0.983253
Sm2	BLA	-0.72201	0.005323	0.20443
Sm2	BMA	-0.09697	0.764337	0.949351
Sm2	Aco	-0.11114	0.730954	0.949351
Sm2	aCeM	-0.21223	0.50783	0.858701
Sm2	aCeC	0.132254	0.682003	0.941287
Sm2	pCeL	-0.50143	0.116097	0.564681
Sm2	LA	0.136029	0.673363	0.940698
Sm2	BLP	-0.14367	0.655998	0.929163
Sm2	BMP	-0.37618	0.228129	0.651003
Sm2	BLV	0.26971	0.396566	0.793879
Sm2	AHiPM(AL)	0.176763	0.625188	0.91149
Sm2	PMCo	0.113633	0.754612	0.949351
Sm2	LC	0.084165	0.784569	0.949351
Sm2	MPB	-0.1543	0.614737	0.91149
Sm2	LPB	-0.03585	0.911918	0.981098
Sm2	DRC	-0.34181	0.27684	0.70033
Sm2	extDRC	0.064536	0.842059	0.963529
Biting of tube 1
Bm1	A24	-0.50218	0.067264	0.410426
Bm1	A25	-0.1584	0.588603	0.900216
Bm1	AcbSh	-0.43212	0.122823	0.564681
Bm1	AcbC	-0.3463	0.225161	0.651003
Bm1	DTT/SHi	-0.39645	0.1605	0.631209
Bm1	LS	-0.54386	0.044391	0.369001
Bm1	MPN	0.480207	0.082227	0.468392
Bm1	cMPOA	0.059694	0.8464	0.963784
Bm1	aACN	-0.29176	0.333423	0.754183
Bm1	pACN	0.33873	0.25758	0.675254
Bm1	BNSTaI	-0.23199	0.445667	0.812566
Bm1	BNSTmpm	0.49785	0.119145	0.564681
Bm1	BNSTrh	0.072816	0.831513	0.962781
Bm1	BNSTtr	0.068482	0.83252	0.962781
Bm1	PVN	0.170554	0.577468	0.897571
Bm1	SON	-0.12177	0.691887	0.941287
Bm1	MeA	-0.18811	0.558235	0.876691
Bm1	MePD	-0.21512	0.501934	0.858701
Bm1	MePV	0.032802	0.923726	0.982508
Bm1	BLA	-0.45749	0.115978	0.564681
Bm1	BMA	0.270766	0.394647	0.793879
Bm1	Aco	-0.10045	0.756104	0.949351
Bm1	aCeM	-0.42853	0.164553	0.635714
Bm1	aCeC	0.086754	0.788633	0.949351
Bm1	pCeL	-0.16383	0.630269	0.916044
Bm1	LA	0.268382	0.398986	0.793879
Bm1	BLP	-0.5603	0.058122	0.388585
Bm1	BMP	-0.15915	0.621264	0.91149
Bm1	BLV	0.194791	0.544071	0.867415
Bm1	AHiPM(AL)	-0.01894	0.958586	0.983253
Bm1	PMCo	-0.01894	0.958586	0.983253
Bm1	LC	-0.29746	0.323636	0.754183
Bm1	MPB	-0.46824	0.106576	0.560424
Bm1	LPB	-0.68122	0.014721	0.280986
Bm1	DRC	-0.39218	0.207344	0.649331
Bm1	extDRC	0.007171	0.982355	0.990823
Biting of tube 2
Bm2	A24	-0.48836	0.076426	0.447094
Bm2	A25	0.018636	0.949582	0.983253
Bm2	AcbSh	-0.11952	0.684021	0.941287
Bm2	AcbC	0.078495	0.789677	0.949351
Bm2	DTT/SHi	-0.35448	0.213669	0.649331
Bm2	LS	-0.59499	0.024798	0.280986
Bm2	MPN	0.120052	0.682689	0.941287
Bm2	cMPOA	-0.23593	0.437745	0.812566
Bm2	aACN	-0.71873	0.005638	0.20443
Bm2	pACN	0.019925	0.948486	0.983253
Bm2	BNSTaI	-0.32877	0.272728	0.693679
Bm2	BNSTmpm	0.291195	0.384968	0.786747
Bm2	BNSTrh	-0.08253	0.809383	0.949351
Bm2	BNSTtr	-0.09011	0.780634	0.949351
Bm2	PVN	-0.50029	0.081658	0.468392
Bm2	SON	-0.01423	0.963192	0.983253
Bm2	MeA	-0.29403	0.353588	0.759079
Bm2	MePD	0.10039	0.756236	0.949351
Bm2	MePV	-0.05155	0.880361	0.970205
Bm2	BLA	-0.34917	0.242249	0.670137
Bm2	BMA	-0.08782	0.786097	0.949351
Bm2	Aco	-0.16619	0.605703	0.911355
Bm2	aCeM	-0.45998	0.132423	0.583087
Bm2	aCeC	0.131053	0.684758	0.941287
Bm2	pCeL	-0.78938	0.003862	0.20443
Bm2	LA	0.636029	0.0262	0.280986
Bm2	BLP	-0.0862	0.789956	0.949351
Bm2	BMP	-0.2315	0.469097	0.831582
Bm2	BLV	0.569388	0.05331	0.369001
Bm2	AHiPM(AL)	0.031565	0.931021	0.983253
Bm2	PMCo	-0.17676	0.625188	0.91149
Bm2	LC	-0.25761	0.395491	0.793879
Bm2	MPB	-0.41701	0.156302	0.620575
Bm2	LPB	-0.4661	0.126691	0.564681
Bm2	DRC	-0.84552	0.000531	0.082891
Bm2	extDRC	-0.60951	0.035374	0.31731
Opening of tube 1
Tm1	A24	-0.61275	0.019818	0.280986
Tm1	A25	-0.17704	0.544868	0.867415
Tm1	AcbSh	-0.58842	0.026861	0.280986
Tm1	AcbC	-0.43403	0.120991	0.564681
Tm1	DTT/SHi	-0.36847	0.194861	0.637726
Tm1	LS	-0.52527	0.053751	0.369001
Tm1	MPN	0.56332	0.035935	0.31731
Tm1	cMPOA	-0.09949	0.746412	0.949351
Tm1	aACN	-0.36008	0.226842	0.651003
Tm1	pACN	0.156556	0.609517	0.911355
Tm1	BNSTaI	-0.34585	0.247073	0.670137
Tm1	BNSTmpm	0.291195	0.384968	0.786747
Tm1	BNSTrh	-0.08253	0.809383	0.949351
Tm1	BNSTtr	-0.09011	0.780634	0.949351
Tm1	PVN	0.250145	0.409791	0.793879
Tm1	SON	-0.24196	0.425772	0.8093
Tm1	MeA	-0.08584	0.790825	0.949351
Tm1	MePD	-0.15776	0.62437	0.91149
Tm1	MePV	0.032802	0.923726	0.982508
Tm1	BLA	-0.63992	0.018493	0.280986
Tm1	BMA	0.204904	0.522927	0.858701
Tm1	Aco	-0.14793	0.64637	0.925287
Tm1	aCeM	-0.38922	0.211103	0.649331
Tm1	aCeC	0.046146	0.88676	0.970205
Tm1	pCeL	-0.10426	0.760321	0.949351
Tm1	LA	0.106618	0.741557	0.949351
Tm1	BLP	-0.5172	0.085071	0.468392
Tm1	BMP	-0.2315	0.469097	0.831582
Tm1	BLV	0.119871	0.710584	0.949351
Tm1	AHiPM(AL)	0.094694	0.794704	0.949351
Tm1	PMCo	0.075755	0.835233	0.962781
Tm1	LC	-0.18929	0.535673	0.867415
Tm1	MPB	-0.39993	0.175735	0.635714
Tm1	LPB	-0.4661	0.126691	0.564681
Tm1	DRC	-0.24106	0.450386	0.812566
Tm1	extDRC	0.207951	0.516628	0.858701
Opening of tube 2
Tm2	A24	-0.63579	0.014531	0.280986
Tm2	A25	-0.09318	0.751377	0.949351
Tm2	AcbSh	-0.34018	0.234016	0.663755
Tm2	AcbC	-0.07388	0.801817	0.949351
Tm2	DTT/SHi	-0.3638	0.201009	0.649331
Tm2	LS	-0.65542	0.01094	0.280986
Tm2	MPN	0.240103	0.408337	0.793879
Tm2	cMPOA	-0.36101	0.225561	0.651003
Tm2	aACN	-0.71873	0.005638	0.20443
Tm2	pACN	-0.05978	0.846191	0.963784
Tm2	BNSTaI	-0.48817	0.09055	0.487099
Tm2	BNSTmpm	0.150294	0.65915	0.929163
Tm2	BNSTrh	-0.21845	0.518724	0.858701
Tm2	BNSTtr	-0.29916	0.344861	0.754183
Tm2	PVN	-0.37522	0.206467	0.649331
Tm2	SON	0.061677	0.841355	0.963529
Tm2	MeA	-0.29403	0.353588	0.759079
Tm2	MePD	-0.07171	0.824737	0.962536
Tm2	MePV	-0.27647	0.41051	0.793879
Tm2	BLA	-0.5202	0.068398	0.410426
Tm2	BMA	-0.2049	0.522927	0.858701
Tm2	Aco	-0.28307	0.372633	0.775078
Tm2	aCeM	-0.49143	0.104678	0.556699
Tm2	aCeC	0.090445	0.77983	0.949351
Tm2	pCeL	-0.73973	0.00926	0.254935
Tm2	LA	0.555147	0.060977	0.401872
Tm2	BLP	-0.1293	0.68879	0.941287
Tm2	BMP	-0.24596	0.440942	0.812566
Tm2	BLV	0.644308	0.023728	0.280986
Tm2	AHiPM(AL)	0.239892	0.504407	0.858701
Tm2	PMCo	-0.13257	0.715042	0.949351
Tm2	LC	-0.33731	0.259713	0.675254
Tm2	MPB	-0.46255	0.111486	0.564681
Tm2	LPB	-0.40873	0.187098	0.635714
Tm2	DRC	-0.78795	0.002336	0.182187
Tm2	extDRC	-0.55215	0.062685	0.401872
First pup released form tube 1
Tml1	A24	-0.61275	0.019818	0.280986
Tml1	A25	-0.17704	0.544868	0.867415
Tml1	AcbSh	-0.58842	0.026861	0.280986
Tml1	AcbC	-0.43403	0.120991	0.564681
Tml1	DTT/SHi	-0.36847	0.194861	0.637726
Tml1	LS	-0.52527	0.053751	0.369001
Tml1	MPN	0.56332	0.035935	0.31731
Tml1	cMPOA	-0.09949	0.746412	0.949351
Tml1	aACN	-0.36008	0.226842	0.651003
Tml1	pACN	0.156556	0.609517	0.911355
Tml1	BNSTaI	-0.34585	0.247073	0.670137
Tml1	BNSTmpm	0.291195	0.384968	0.786747
Tml1	BNSTrh	-0.08253	0.809383	0.949351
Tml1	BNSTtr	-0.09011	0.780634	0.949351
Tml1	PVN	0.250145	0.409791	0.793879
Tml1	SON	-0.24196	0.425772	0.8093
Tml1	MeA	-0.08584	0.790825	0.949351
Tml1	MePD	-0.15776	0.62437	0.91149
Tml1	MePV	0.032802	0.923726	0.982508
Tml1	BLA	-0.63992	0.018493	0.280986
Tml1	BMA	0.204904	0.522927	0.858701
Tml1	Aco	-0.14793	0.64637	0.925287
Tml1	aCeM	-0.38922	0.211103	0.649331
Tml1	aCeC	0.046146	0.88676	0.970205
Tml1	pCeL	-0.10426	0.760321	0.949351
Tml1	LA	0.106618	0.741557	0.949351
Tml1	BLP	-0.5172	0.085071	0.468392
Tml1	BMP	-0.2315	0.469097	0.831582
Tml1	BLV	0.119871	0.710584	0.949351
Tml1	AHiPM(AL)	0.094694	0.794704	0.949351
Tml1	PMCo	0.075755	0.835233	0.962781
Tml1	LC	-0.18929	0.535673	0.867415
Tml1	MPB	-0.39993	0.175735	0.635714
Tml1	LPB	-0.4661	0.126691	0.564681
Tml1	DRC	-0.24106	0.450386	0.812566
Tml1	extDRC	0.207951	0.516628	0.858701
Second pup released from tube 1
Tml2	A24	-0.7095	0.004482	0.20443
Tml2	A25	-0.01864	0.949582	0.983253
Tml2	AcbSh	-0.43212	0.122823	0.564681
Tml2	AcbC	-0.09696	0.74158	0.949351
Tml2	DTT/SHi	-0.29851	0.299898	0.738697
Tml2	LS	-0.55781	0.038198	0.325028
Tml2	MPN	0.286277	0.321072	0.754183
Tml2	cMPOA	-0.5543	0.049324	0.369001
Tml2	aACN	-0.85537	0.000193	0.045156
Tml2	pACN	-0.34442	0.249154	0.670137
Tml2	BNSTaI	-0.55649	0.048248	0.369001
Tml2	BNSTmpm	-0.01879	0.956278	0.983253
Tml2	BNSTrh	-0.31554	0.344548	0.754183
Tml2	BNSTtr	-0.40729	0.188813	0.635714
Tml2	PVN	-0.34111	0.254042	0.675254
Tml2	SON	-0.25461	0.401194	0.793879
Tml2	MeA	0.012784	0.968546	0.983253
Tml2	MePD	0.215121	0.501934	0.858701
Tml2	MePV	-0.05155	0.880361	0.970205
Tml2	BLA	-0.71403	0.006115	0.20443
Tml2	BMA	-0.16831	0.601042	0.910315
Tml2	Aco	-0.19176	0.550475	0.867415
Tml2	aCeM	-0.31059	0.325825	0.754183
Tml2	aCeC	0.049837	0.877759	0.970205
Tml2	pCeL	-0.6603	0.027018	0.280986
Tml2	LA	0.3125	0.322693	0.754183
Tml2	BLP	0	1	1
Tml2	BMP	-0.37618	0.228129	0.651003
Tml2	BLV	0.419549	0.174554	0.635714
Tml2	AHiPM(AL)	0.164137	0.650469	0.925287
Tml2	PMCo	0.06313	0.862453	0.970205
Tml2	LC	-0.04127	0.893501	0.970205
Tml2	MPB	-0.28038	0.353481	0.759079
Tml2	LPB	-0.03585	0.911918	0.981098
Tml2	DRC	-0.54329	0.067917	0.410426
Tml2	extDRC	-0.20795	0.516628	0.858701
First pup carried into living area
X1	A24	-0.61275	0.019818	0.280986
X1	A25	-0.17704	0.544868	0.867415
X1	AcbSh	-0.58842	0.026861	0.280986
X1	AcbC	-0.43403	0.120991	0.564681
X1	DTT/SHi	-0.36847	0.194861	0.637726
X1	LS	-0.52527	0.053751	0.369001
X1	MPN	0.56332	0.035935	0.31731
X1	cMPOA	-0.09949	0.746412	0.949351
X1	aACN	-0.36008	0.226842	0.651003
X1	pACN	0.156556	0.609517	0.911355
X1	BNSTaI	-0.34585	0.247073	0.670137
X1	BNSTmpm	0.291195	0.384968	0.786747
X1	BNSTrh	-0.08253	0.809383	0.949351
X1	BNSTtr	-0.09011	0.780634	0.949351
X1	PVN	0.250145	0.409791	0.793879
X1	SON	-0.24196	0.425772	0.8093
X1	MeA	-0.08584	0.790825	0.949351
X1	MePD	-0.15776	0.62437	0.91149
X1	MePV	0.032802	0.923726	0.982508
X1	BLA	-0.63992	0.018493	0.280986
X1	BMA	0.204904	0.522927	0.858701
X1	Aco	-0.14793	0.64637	0.925287
X1	aCeM	-0.38922	0.211103	0.649331
X1	aCeC	0.046146	0.88676	0.970205
X1	pCeL	-0.10426	0.760321	0.949351
X1	LA	0.106618	0.741557	0.949351
X1	BLP	-0.5172	0.085071	0.468392
X1	BMP	-0.2315	0.469097	0.831582
X1	BLV	0.119871	0.710584	0.949351
X1	AHiPM(AL)	0.094694	0.794704	0.949351
X1	PMCo	0.075755	0.835233	0.962781
X1	LC	-0.18929	0.535673	0.867415
X1	MPB	-0.39993	0.175735	0.635714
X1	LPB	-0.4661	0.126691	0.564681
X1	DRC	-0.24106	0.450386	0.812566
X1	extDRC	0.207951	0.516628	0.858701
Second pup carried into living area
X2	A24	-0.7095	0.004482	0.20443
X2	A25	-0.01864	0.949582	0.983253
X2	AcbSh	-0.43212	0.122823	0.564681
X2	AcbC	-0.09696	0.74158	0.949351
X2	DTT/SHi	-0.29851	0.299898	0.738697
X2	LS	-0.55781	0.038198	0.325028
X2	MPN	0.286277	0.321072	0.754183
X2	cMPOA	-0.5543	0.049324	0.369001
X2	aACN	-0.85537	0.000193	0.045156
X2	pACN	-0.34442	0.249154	0.670137
X2	BNSTaI	-0.55649	0.048248	0.369001
X2	BNSTmpm	-0.01879	0.956278	0.983253
X2	BNSTrh	-0.31554	0.344548	0.754183
X2	BNSTtr	-0.40729	0.188813	0.635714
X2	PVN	-0.34111	0.254042	0.675254
X2	SON	-0.25461	0.401194	0.793879
X2	MeA	0.012784	0.968546	0.983253
X2	MePD	0.215121	0.501934	0.858701
X2	MePV	-0.05155	0.880361	0.970205
X2	BLA	-0.71403	0.006115	0.20443
X2	BMA	-0.16831	0.601042	0.910315
X2	Aco	-0.19176	0.550475	0.867415
X2	aCeM	-0.31059	0.325825	0.754183
X2	aCeC	0.049837	0.877759	0.970205
X2	pCeL	-0.6603	0.027018	0.280986
X2	LA	0.3125	0.322693	0.754183
X2	BLP	0	1	1
X2	BMP	-0.37618	0.228129	0.651003
X2	BLV	0.419549	0.174554	0.635714
X2	AHiPM(AL)	0.164137	0.650469	0.925287
X2	PMCo	0.06313	0.862453	0.970205
X2	LC	-0.04127	0.893501	0.970205
X2	MPB	-0.28038	0.353481	0.759079
X2	LPB	-0.03585	0.911918	0.981098
X2	DRC	-0.54329	0.067917	0.410426
X2	extDRC	-0.20795	0.516628	0.858701
First pup retrieved into the nest
R1	A24	-0.5759	0.031143	0.310109
R1	A25	-0.08386	0.775627	0.949351
R1	AcbSh	-0.52406	0.054404	0.369001
R1	AcbC	-0.36939	0.193659	0.637726
R1	DTT/SHi	-0.33115	0.247457	0.670137
R1	LS	-0.44625	0.109725	0.564681
R1	MPN	0.526381	0.053154	0.369001
R1	cMPOA	-0.1336	0.663471	0.932446
R1	aACN	-0.42839	0.144155	0.593607
R1	pACN	0.054083	0.860705	0.970205
R1	BNSTaI	-0.3003	0.318803	0.754183
R1	BNSTmpm	0.328769	0.323556	0.754183
R1	BNSTrh	-0.02427	0.943528	0.983253
R1	BNSTtr	-0.03965	0.902634	0.977854
R1	PVN	0.204664	0.502392	0.858701
R1	SON	-0.43806	0.13434	0.583087
R1	MeA	0.118709	0.713285	0.949351
R1	MePD	0.071707	0.824737	0.962536
R1	MePV	0.257731	0.444188	0.812566
R1	BLA	-0.65132	0.015887	0.280986
R1	BMA	0.307356	0.331145	0.754183
R1	Aco	-0.00913	0.977531	0.990226
R1	aCeM	-0.24768	0.437653	0.812566
R1	aCeC	0.046146	0.88676	0.970205
R1	pCeL	-0.0844	0.805126	0.949351
R1	LA	0.025735	0.936723	0.983253
R1	BLP	-0.431	0.16187	0.631293
R1	BMP	-0.28937	0.361629	0.769284
R1	BLV	-0.02997	0.926339	0.983054
R1	AHiPM(AL)	-0.09469	0.794704	0.949351
R1	PMCo	0.176763	0.625188	0.91149
R1	LC	-0.00142	0.996318	1
R1	MPB	-0.28607	0.343372	0.754183
R1	LPB	-0.30834	0.329518	0.754183
R1	DRC	-0.14752	0.6473	0.925287
R1	extDRC	0.351365	0.262741	0.675619
Second pup retrieved into the nest
R2	A24	-0.74636	0.002169	0.182187
R2	A25	-0.11181	0.703532	0.948855
R2	AcbSh	-0.49648	0.070943	0.420271
R2	AcbC	-0.16161	0.580979	0.897571
R2	DTT/SHi	-0.33582	0.240454	0.670137
R2	LS	-0.63683	0.01432	0.280986
R2	MPN	0.323216	0.259656	0.675254
R2	cMPOA	-0.52019	0.068404	0.410426
R2	aACN	-0.78705	0.001409	0.164844
R2	pACN	-0.24195	0.425797	0.8093
R2	BNSTaI	-0.60203	0.029472	0.299848
R2	BNSTmpm	-0.05636	0.869266	0.970205
R2	BNSTrh	-0.37379	0.257461	0.675254
R2	BNSTtr	-0.45775	0.134558	0.583087
R2	PVN	-0.29563	0.326765	0.754183
R2	SON	-0.05851	0.849405	0.964858
R2	MeA	-0.19176	0.550475	0.867415
R2	MePD	-0.01434	0.964716	0.983253
R2	MePV	-0.27647	0.41051	0.793879
R2	BLA	-0.70262	0.0074	0.216437
R2	BMA	-0.27077	0.394647	0.793879
R2	Aco	-0.33056	0.293973	0.735717
R2	aCeM	-0.45212	0.140037	0.586635
R2	aCeC	0.049837	0.877759	0.970205
R2	pCeL	-0.68015	0.02128	0.280986
R2	LA	0.393382	0.205828	0.649331
R2	BLP	-0.0862	0.789956	0.949351
R2	BMP	-0.31831	0.313297	0.754183
R2	BLV	0.569388	0.05331	0.369001
R2	AHiPM(AL)	0.353525	0.316283	0.754183
R2	PMCo	-0.03788	0.917261	0.982508
R2	LC	-0.22914	0.451426	0.812566
R2	MPB	-0.39424	0.182539	0.635714
R2	LPB	-0.19361	0.546564	0.867415
R2	DRC	-0.63684	0.025951	0.280986
R2	extDRC	-0.35137	0.262741	0.675619
